# Supplementary material
Source: PubMed Central journal article supplement (PMC3618504)

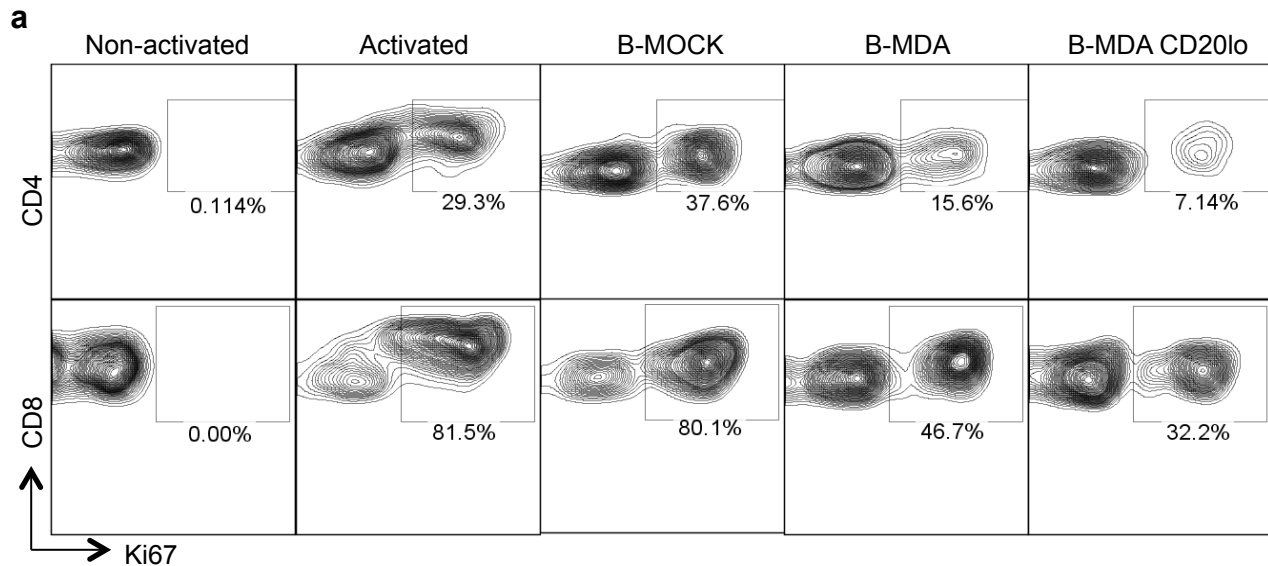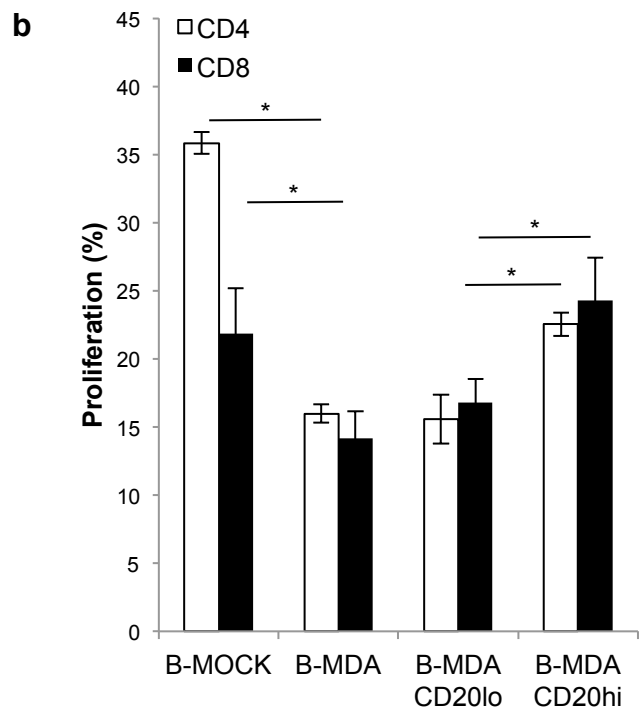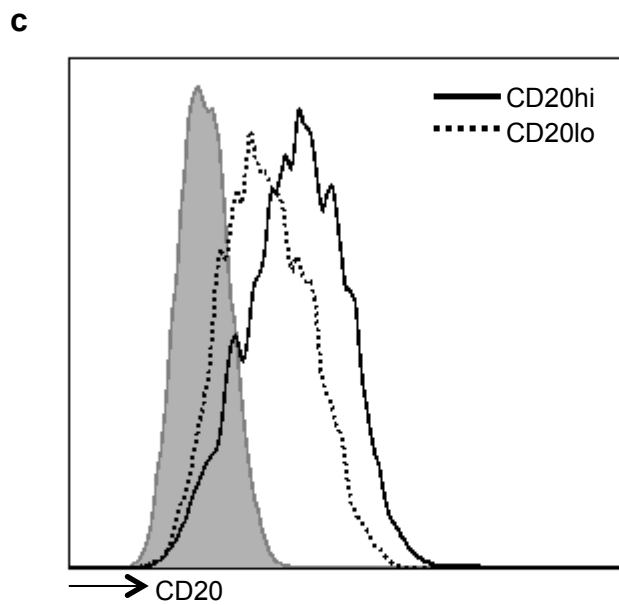

Supplement: NIHMS441371-supplement-2.pdf [file NIHMS441371-supplement-2.pdf]

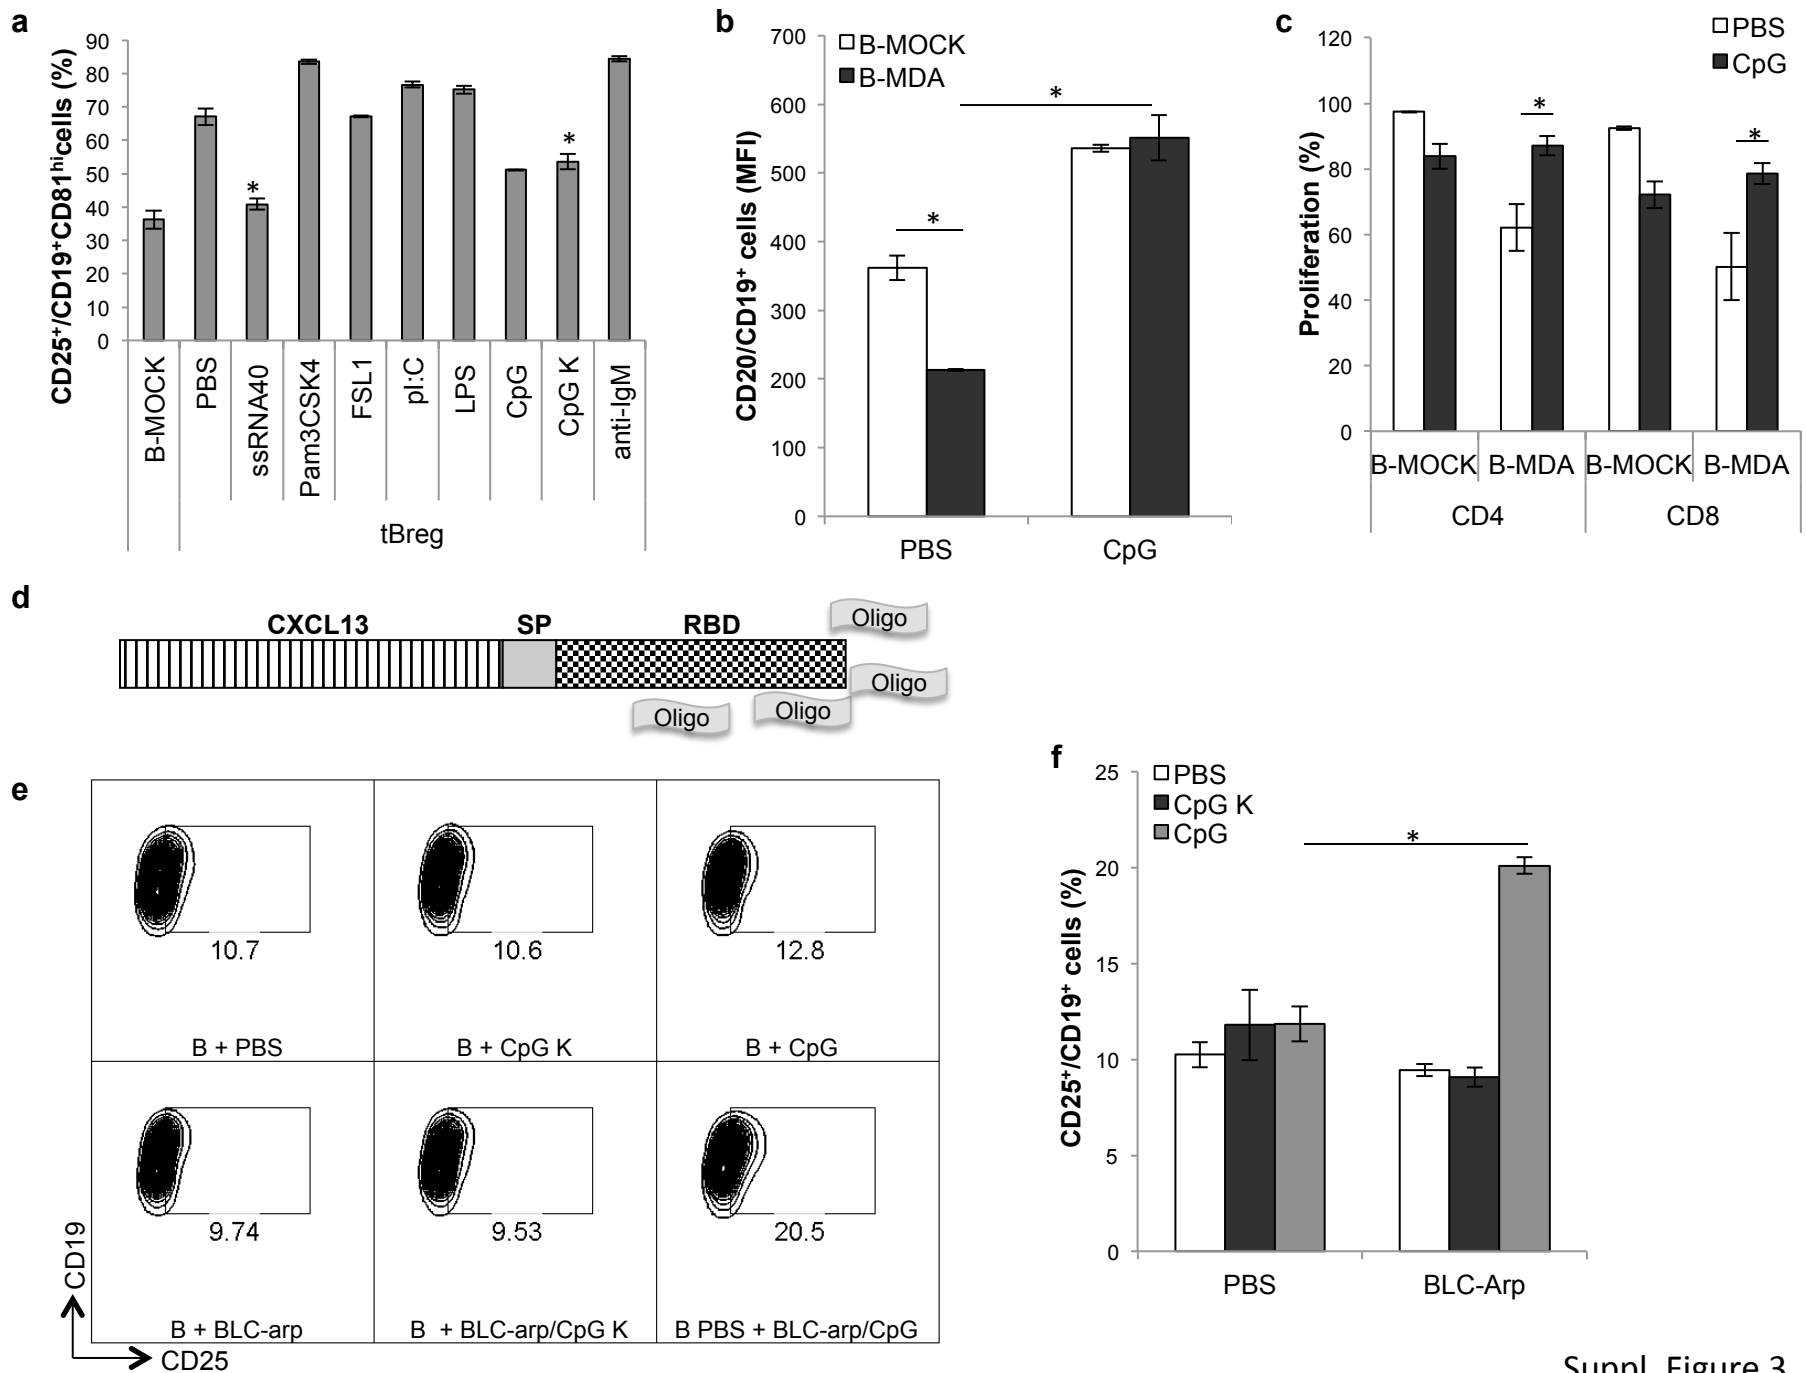

Suppl. Figure 3

Supplement: NIHMS441371-supplement-3.pdf [file NIHMS441371-supplement-3.pdf]

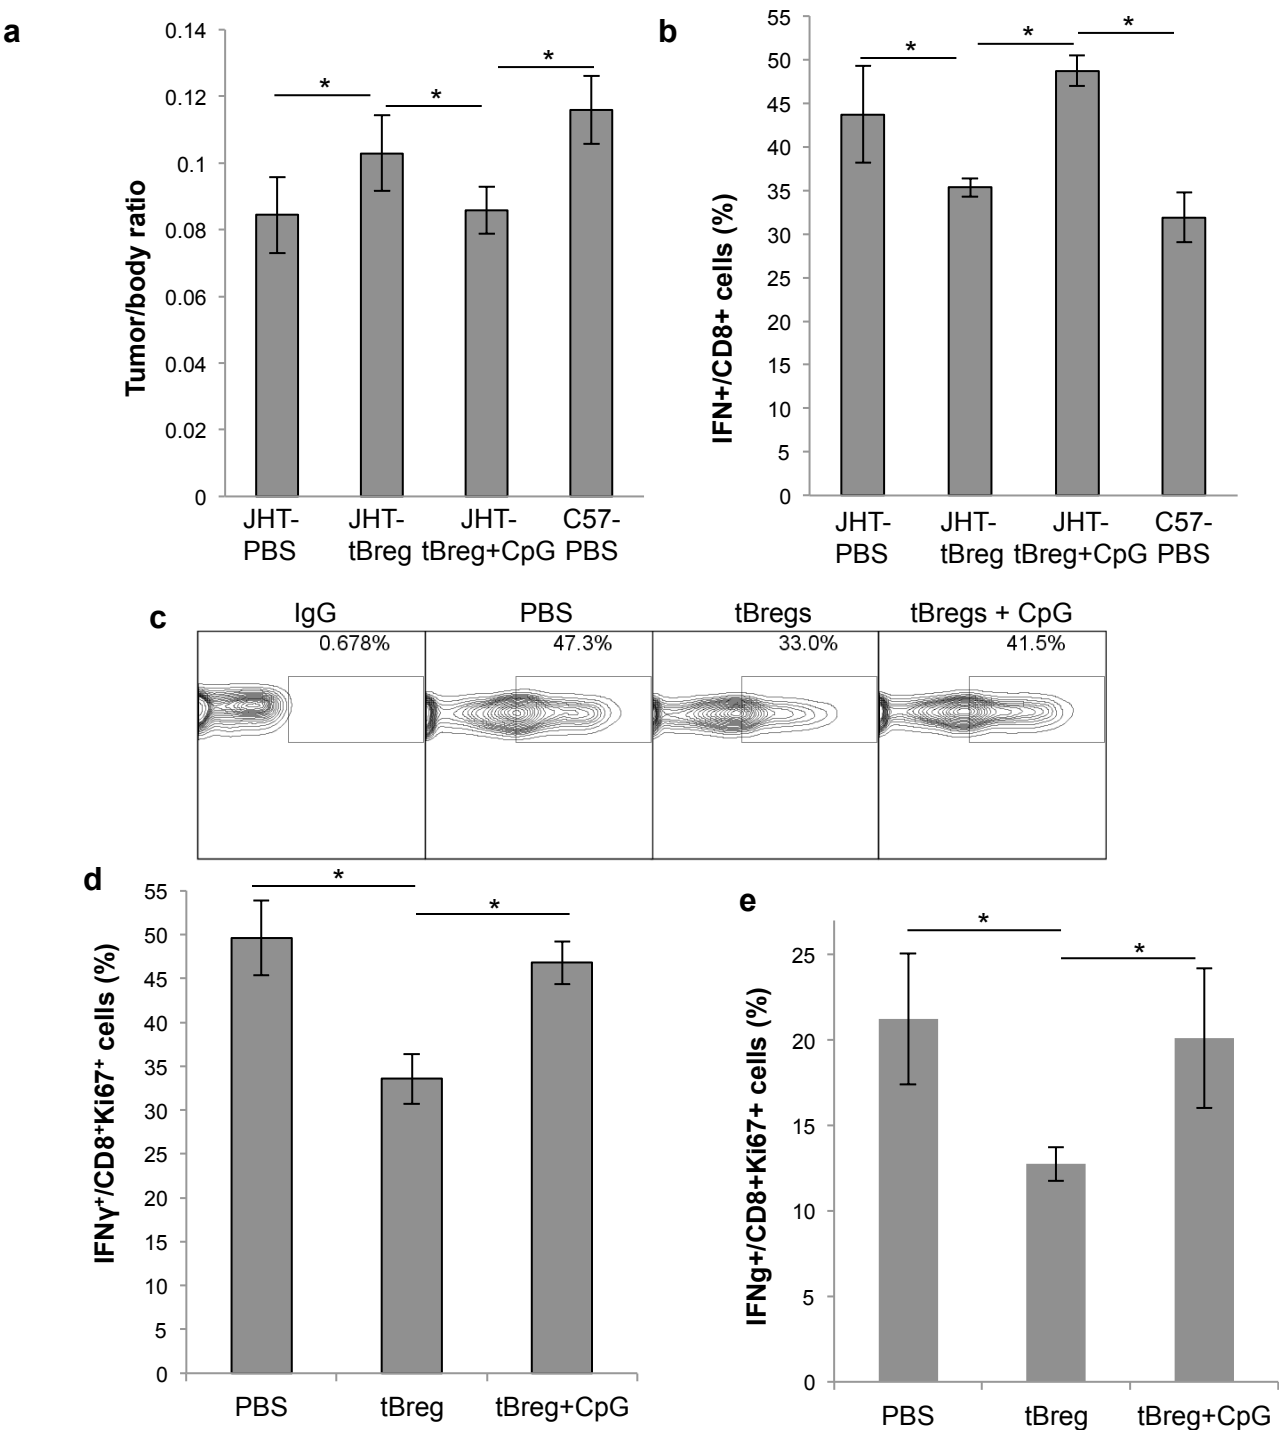

Supplement: NIHMS441371-supplement-5.pdf [file NIHMS441371-supplement-5.pdf]
